# Supplementary material for: The effect of multi-directional sprint training on change-of-direction speed and reactive agility of collegiate tennis players
Source: PeerJ. 2024 Oct 18;12:e18263. doi: 10.7717/peerj.18263 (PMC11493021; doi:10.7717/peerj.18263)
Supplement: Supplemental Information 1 [file peerj-12-18263-s001.xlsx]

## Sheet: Sheet1
Group (1=RR,2=FR)	id	Hieght	weight	Age	ITN score	ITN grade	Training years	Pre-spider run test	Post-spider run test	Pre-T-drill test	Post-T-drill test	Pre-reactive agility test	Post-reactive agility test	Pre-5-m straight sprint test	Post-5-m straight sprint test
1	1	179	70	24	271	4	7	17.1	17.01	7.639	7.535	19.89	17.49	1.079	0.811
1	2	175	74	26	252	5	6	17.79	17.67	8.103	7.902	20.23	16.87	1.021	0.816
1	3	186	71	21	257	5	6	15.8	15.66	8.039	7.156	16.99	15.38	0.876	0.868
1	4	170	65	19	261	5	6.5	17.67	16.88	8.136	8.015	19.9	15.87	1.025	0.792
1	5	176	72	23	249	5	6	18.71	18.51	8.334	8.185	20.86	18.07	0.872	0.861
1	6	180	68	22	273	4	7	16.57	16.41	8.113	8.007	18.32	16.03	1.066	0.878
1	7	180	72	20	246	5	7	18.66	18.09	8.653	8.541	18.48	16.35	1.085	0.953
1	8	176	77	24	275	4	6.5	15.68	15.57	8.276	8.162	19.96	17.32	0.907	0.804
1	9	174	72	21	296	3	8	15.48	15.34	7.861	7.762	17.77	16.46	1.005	0.831
2	10	178	68	23	254	5	6	17.2	16.05	7.98	7.575	18.51	15.88	0.932	0.785
2	11	173	69	22	248	5	6	18.33	17.76	9.028	8.676	20.44	18.55	1.016	0.859
2	12	178	80	24	279	4	7	16.28	16.29	7.973	7.9	17.28	15.76	1.004	0.865
2	13	175	73	22	281	4	7.5	15.39	15.29	7.271	6.85	18.95	16.64	0.993	0.833
2	14	177	68	23	258	5	6	16.35	16.32	7.837	7.353	18.84	16.68	0.979	0.792
2	15	170	58	23	246	5	6	16.45	16.37	8.25	8.119	18.17	17.43	1.048	0.781
2	16	183	83	22	250	5	6	16.48	16.46	7.624	7.558	17.95	17.07	0.938	0.792
2	17	180	70	21	255	4	7	16.35	16.31	7.302	7.217	18.51	17.53	0.857	0.821
2	18	182	77	18	295	3	8	16.39	16.12	7.907	7.802	18.69	16.86	0.961	0.854
2	19	179	73	21	254	5	6	15.83	15.79	7.658	7.336	15.79	15.33	0.935	0.793
